# Supplementary material for: Timed adoptive T cell transfer during chemotherapy in patients with recurrent platinum-sensitive epithelial ovarian cancer
Source: PubMed Central journal article supplement — J Immunother Cancer. 2023 Nov 10;11(11):e007697. doi: 10.1136/jitc-2023-007697 (PMC10649798; doi:10.1136/jitc-2023-007697), 2023-11-10
Supplement: jitc-2023-007697supp002.pdf [file jitc-2023-007697supp002.pdf]

## 1 **Supplemental Material**

2

### 3 **Methods**

#### 4 *Generation of TIL for infusion*

5 TIL for infusion were cultured from a small resected tumor sample or biopsy, as previously  
6 described (1, 2). In brief, TIL were cultured in T cell medium (Iscoves Modified Dulbecco's  
7 Medium (IMDM) with penicillin (100 IU/ml), streptomycin (100 µg/ml) and L-glutamine (4mM)  
8 (all from Life Technologies, Breda, the Netherlands), and 7.5% heat inactivated pooled human  
9 serum (Sanquin, Bloodbank, Amsterdam, the Netherlands) supplemented with interleukin-2 (IL-  
10 2, 1000 IU/ml, Aldesleukin, Clinigen Healthcare BV, Netherlands) for a total period of 14-21  
11 days. Next, the TIL were expanded according to the described Rapid Expansion Protocol (REP)  
12 (1) for another 14 days before harvesting and cryopreservation, until further use. TIL were  
13 released for infusion when they met the release criteria with respect to phenotype (>80% T or  
14 NK cells), viability (>70% viable cells) and if negative in microbial contamination tests.

15

#### 16 *Immunophenotyping of PBMC*

17 Cryopreserved PBMC collected before and during treatment were thawed in IMDM plus 10%  
18 FCS and 30 µg/ml DNase (Roche, 10104159001) and washed twice with FACS buffer, consisting  
19 of PBS with 0,5% BSA (Sigma). PBMC samples were immunophenotyped using a 40-marker panel  
20 and multispectral flow cytometry. Fluorophore selection and panel design were done according  
21 to the following rules: 1) minimize fluorochrome pairs with very high similarity indices, 2) select  
22 combinations with lowest possible complexity index, 3) assignment fluorophores based on  
23 primary, secondary and tertiary antigen classification as described (3). All antibodies were  
24 titrated, and the optimal titer of the antibody was based on performance comparison between

1

25 the single stained sample and the multi-color sample. Unmixing accuracy was tested for each  
26 individual antibody using beads and single stained cells. Details on antibodies, titers and  
27 unmixing are listed in Supplemental Table 1. First, samples were stained with LIVE-DEAD zombie  
28 UV fixable amine-reactive dye at room temperature for 20 minutes, after which the cells were  
29 washed, and incubated with 50  $\mu$ l PBS/0.5%BSA containing 2.5  $\mu$ l human Trustain FcX blocking  
30 solution (Biolegend) for 10 minutes on ice to block Fc receptors. Next, the cells were stained for  
31 30 minutes at room temperature in the dark with the cell surface antibodies in two consecutive  
32 rounds with sufficient washing in between. Intracytoplasmic/nuclear staining was performed  
33 using the True-Nuclear Transcription factor buffer set (Biolegend) according to manufacturers'  
34 instruction. Finally, the cells were washed twice, stored in FACS buffer (PBS/0.5% BSA).  
35 Acquisition of the samples was done within 24 hours on a 5-laser Aurora Cytex™ spectral  
36 analyzer (Cytex Biosciences, CA, USA) with SpectroFlo acquisition software (version 3). Data  
37 analysis was done by high-dimensional single cell data analysis using optSNE dimensionality  
38 reduction followed by FlowSOM consensus metaclustering using the cloud-based OMIQ data  
39 analysis software. The different cell populations were visualized and quantified.

40

#### 41 *Lymphocyte function/proliferation*

42 The proliferative potential of peripheral blood mononuclear cells (PBMC) was evaluated using a  
43 proliferation assay, as previously described (4). Briefly, cryopreserved PBMC were thawed in  
44 IMDM plus 10% FCS and 30  $\mu$ g/ml DNase and stimulated in 6-fold with the previously described  
45 memory response mix (MRM, 2x concentrated, 50000 c/w), influenza matrix 1 protein-derived  
46 overlapping peptides (FLU-M1, 5  $\mu$ g/mL per peptide, 50000 c/w) or CD3/CD28-activation beads  
47 (ratio 1:4 beads to cells, Dynabead, 10000c/w) for 6 days. After harvesting 50  $\mu$ L supernatant  
48 per well for cytokine analysis, [3H]-Thymidine (Perkin Elmer) was added to the wells for 16

49 hours before the cells were harvested. [3H]-Thymidine uptake was determined by Wallac  
50 Microbeta Trilux (Perkin Elmer) and used to calculate proliferation. Cells cultured in the  
51 presence of medium only were included as negative controls. A positive response was defined  
52 as a stimulation index (SI) of at least 3.

53

#### 54 *APC function*

55 The antigen-presenting capacity of PBMC was determined in a mixed lymphocyte reaction  
56 (MLR). Patients' PBMC were thawed in IMDM plus 10% FCS and 30 µg/ml DNase, irradiated  
57 (3000 rad) to prevent proliferation, washed, and resuspended in IMDM plus 10% human AB  
58 serum. Next, they were plated in a 1:1 ratio with third party PBMC and total volume of 200  
59 µL/well in 96 well plates. Irradiated PBMC alone, as well as third party PBMC alone, were used  
60 as negative controls. At day 6, 100 µL supernatant per well was harvested for cytokine analysis,  
61 and [3H]-Thymidine (50 µL/well of 10 µCi/mL) was added for an additional 16 hours. Cells were  
62 harvested and [3H]-Thymidine uptake was determined by Wallac MicroBeta TriLux and used to  
63 calculate proliferation. A positive response was defined as an SI of at least 3 (4).

64

#### 65 *Immunophenotyping of tumor infiltrating lymphocytes (TIL)*

66 To assess the phenotypic characteristics of TIL batches used for infusion, cryopreserved  
67 reference vials of TIL were thawed in IMDM plus 10% FCS and 30 µg/ml DNase, washed twice  
68 and resuspended in FACS-buffer. Next, the samples were divided into multiple samples and  
69 stained with separate antibody panels for activation/inhibitory, memory, homing and regulatory  
70 T cell markers, respectively as we previously described (2) according to our standard protocols  
71 (5). In brief, TIL batches were first stained with LIVE-DEAD Fixable yellow amine-reactive dye  
72 (Yellow ArC-Qdot585, ThermoFisher Scientific, L34959) at room temperature for 20 minutes,

73 after which the cells were washed, and incubated with PBS/0.5%BSA/10%FCS for 10 minutes on  
74 ice to block Fc receptors. Next, the cells were stained for 30 minutes on ice and in the dark with  
75 fluorochrome-conjugated antibodies. Intracytoplasmic/nuclear staining was performed using  
76 the transcription factor buffer set (BD Pharmingen) according to manufacturers' instruction.  
77 Details on antibodies used are listed in supplemental Table 2. After staining the cells were  
78 washed twice and fixed in 1% paraformaldehyde before data acquisition on a BD LSR Fortessa  
79 (BD Biosciences). Data analysis was done by high-dimensional single cell data analysis using  
80 optSNE dimensionality reduction followed by FlowSOM consensus metaclustering using the  
81 cloud-based OMIQ data analysis software. The different cell populations were visualized and  
82 quantified.

83

#### 84 *Autologous tumor cells and ovarian cell lines*

85 Small tumor fragments were cryopreserved for later use as autologous target cells in assays  
86 conducted to detect tumor cell-reactivity of TIL batches. Ovarian carcinoma cell lines were  
87 previously established in our laboratory (COV318, COV362.4, COV413B, COV434, COV504,  
88 COV641 II, Ref COV lines), obtained from ATCC (A2780, CAOV3, OVCAR3 and SKOV3, ATCC,  
89 Manassas,VA, USA) or kindly provided by Inge Marie Svane (EOC.TIL 04, EOC.TIL 11 and GY-  
90 1508.06, CCIT-DK, Herlev Hospital, Copenhagen, Denmark (6)). Authentication of the cell lines  
91 was performed by HLA-genotyping at the department of Immunohematology and Blood bank of  
92 the LUMC and all cell lines were regularly tested to be mycoplasma negative. The cell lines  
93 obtained from I.M. Svane were cultured in RPMI/glutamax supplemented with 10 % heat  
94 inactivated Fetal Calf Serum (FCS, Life Technologies), penicillin (100 IU/ml), streptomycin (100  
95 µg/ml), 0,5% fungizone, insulin (10ug/ml) and sodium pyruvate (1mM). All other cell lines were  
96 cultured in 'tumor cell medium' (i.e. Dulbecco's minimal essential medium (Life Technologies,

97 Breda, the Netherlands) with 8% heat inactivated FCS, penicillin (100 IU/ml), streptomycin (100  
98  $\mu\text{g/ml}$ ) and L-glutamine (4 mM). All culture media and supplements were obtained from Life  
99 Technologies. Tumor cells were treated with medium alone or IFN-gamma (IFNg, 100 IU/ml for  
100 24-48 h, Preprotech) to upregulate HLA-expression, before being used as target cells.

101

102 *Tumor-reactivity of TIL.* The antigen-specificity of the infusion product was tested against a  
103 broad panel of EOC cell lines that were (partially) matched for at least one HLA-class I allele with  
104 the corresponding patient. If available, autologous tumor cells were also tested. Briefly,  $1.5 \times 10^4$   
105 T cells (effector cells) were co-cultured with  $3 \times 10^4$  target (tumor) cells in a total volume of 150  $\mu\text{l}$   
106 B cell medium (i.e. T cell medium with 8% FCS instead of human serum) in triplicate wells of a  
107 round-bottom 96-well plate. Medium alone and Staphylococcal Enterotoxin B (SEB, 0,5  $\mu\text{g/ml}$ )  
108 were used as negative and positive controls, respectively. In case that autologous tumor  
109 material was used as target, equal parts of small tumor fragments were plated in the test and  
110 control wells, and co-cultured with TIL or medium alone, respectively. After overnight  
111 incubation at 37 °C the supernatant was harvested and, as a read-out of tumor-reactivity, the  
112 IFNg secretion was determined by ELISA (Elisa Flex, Mabtech, Nacka Strand, Sweden) according  
113 to manufacturer's recommendations. Specific cytokine production was defined by a cytokine  
114 concentration above the cut-off value (IFNg 50 pg/ml) and >2x the concentration of the medium  
115 control.

116

117 *Cytokine profile of TIL.* To characterize the cytokine profile potentially released upon activation  
118 of the infused TIL, TIL were stimulated with CD3/CD28 activation beads (Dynabeads,  
119 Thermofisher ratio 1:4 beads to T cells) or medium alone as negative control. After incubation

120 for 24 h supernatant was harvested and used to analyze the IFN $\gamma$  production by ELISA (as  
121 above).

122

123 *Statistical analysis.* Survival and PFS were estimated according to the Kaplan-Meier's method  
124 using GraphPad Prism version 9.3.1. 1 for Windows (GraphPad Software, La Jolla California USA).

125 Paired and independent analyses were performed on the data generated by FACS analysis on  
126 both the T cell products and PBMC. To compare data following a normal distribution either a  
127 paired or unpaired t-test was used, when the assumption of normality was violated a Wilcoxon  
128 signed rank test was performed for paired comparisons and a Mann-Whitney U test was  
129 performed for unpaired comparisons. In case of multiple comparisons a Friedman for paired  
130 comparisons or Kruskal-Wallis for unpaired analysis both with Dunn's correction for multiple  
131 comparisons was used.

## 132 **References**

133

- 134 1. Dudley ME, Wunderlich JR, Robbins PF, Yang JC, Hwu P, Schwartzentruber DJ, et  
135 al. Cancer regression and autoimmunity in patients after clonal repopulation  
136 with antitumor lymphocytes. *Science*. 2002;298(5594):850-4.
- 137 2. Verdegaal E, van der Kooij MK, Visser M, van der Minne C, de Bruin L, Meij P, et  
138 al. Low-dose interferon-alpha preconditioning and adoptive cell therapy in  
139 patients with metastatic melanoma refractory to standard (immune) therapies: a  
140 phase I/II study. *J Immunother Cancer*. 2020;8(1).
- 141 3. Park LM, Lannigan J, and Jaimes MC. OMIP-069: Forty-Color Full Spectrum Flow  
142 Cytometry Panel for Deep Immunophenotyping of Major Cell Subsets in Human  
143 Peripheral Blood. *Cytometry A*. 2020;97(10):1044-51.
- 144 4. Welters MJ, van der Sluis TC, van Meir H, Loof NM, van Ham VJ, van Duikeren S,  
145 et al. Vaccination during myeloid cell depletion by cancer chemotherapy fosters  
146 robust T cell responses. *Sci Transl Med*. 2016;8(334):334ra52.
- 147 5. van der Burg SH, Kalos M, Gouttefangeas C, Janetzki S, Ottensmeier C, Welters  
148 MJ, et al. Harmonization of immune biomarker assays for clinical studies. *Sci  
149 Transl Med*. 2011;3(108):108ps44.
- 150 6. Pedersen M, Westergaard MCW, Milne K, Nielsen M, Borch TH, Poulsen LG, et al.  
151 Adoptive cell therapy with tumor-infiltrating lymphocytes in patients with  
152 metastatic ovarian cancer: a pilot study. *Oncoimmunology*.  
153 2018;7(12):e1502905.

154

155 Supplemental Tables

**Supplemental Table 1. Antibody panel spectral flowcytometry for immunophenotyping of PBMC samples.**

| laser              | Detector  | Fluorochrome   | Antigen     | Clone name   | Company           | Lot             | Dilution   | Unmixing   |            |
|--------------------|-----------|----------------|-------------|--------------|-------------------|-----------------|------------|------------|------------|
| UltraViolet laser  | UV2       | BUV395         | CD45RA      | HI100        | BD                | 276592          | 320        | with beads |            |
|                    | UV4       | Zombie UV      | L/D         | NA           | biolegend         | NA              | 2400       | with cells |            |
|                    | UV7       | BUV496         | CD16        | 3G8          | BD                | 1099494         | 80         | with cells |            |
|                    | UV9       | BUV563         | CD39        | TU66         | BD                | 1162869         | 40         | with beads |            |
|                    | UV10      | BUV615         | ICOS        | DX29         | BD                | 276620          | 80         | with beads |            |
|                    | UV11      | BUV661         | CD1c        | F10/21A3     | BD                | 276617/1288139  | 40         | with cells |            |
|                    | UV14      | BUV737         | CD86        | 2331 (FUN-1) | BD                | 258384          | 160        | with beads |            |
| UV16               | BUV805    | CD8            | SK1/HIT8a   | BD           | 195680/1200765    | 160             | with cells |            |            |
| violet laser       | V1        | BV421          | CD161       | HP-3G10      | biolegend         | B334264         | 10         | with beads |            |
|                    | V2        | SB436          | CD123       | 6H6          | TFS               | 2196734/2271503 | 40         | with beads |            |
|                    | V3        | PacBlue        | CD15        | W6D3         | biolegend         | B273508         | 20         | with beads |            |
|                    | V4        | BV480          | CD33        | P67.6        | BD                | 276608          | 640        | with beads |            |
|                    | V6        | BV510          | CD11c       | B-Ly6        | BD                | 149997/1235761  | 40         | with cells |            |
|                    | V7        | PacOrange      | CD3         | UCHT1        | exbio             | 2081485         | 20         | with cells |            |
|                    | V8        | BV570          | CD45RO      | UCHL1        | biolegend         | B326241         | 40         | with beads |            |
|                    | V10       | BV605          | CD163       | GHI/61       | biolegend         | B306652         | 10         | with beads |            |
|                    | V11       | BV650          | PD1         | EH12.2H7     | biolegend         | B322203         | 40         | with beads |            |
|                    | V13       | BV711          | CD103       | Ber-ACT8     | biolegend         | B305675         | 80         | with beads |            |
|                    | V14       | BV750          | CD56        | 5.1H11       | biolegend         | B305755         | 80         | with beads |            |
| V15                | BV785     | CD28           | CD28.2      | biolegend    | B332622           | 80              | with cells |            |            |
| blue laser         | B1        | BB515          | CD141       | 1A4          | BD                | 212775          | 160        | with beads |            |
|                    | B2        | AF488          | Foxp3       | 259D         | biolegend         | B315166         | 40         | with beads |            |
|                    | B3        | Spark Blue 550 | CD14        | 63D6         | biolegend         | B314183         | 320        | with cells |            |
|                    | B8        | PerCP          | CD45        | Hi30         | biolegend         | B331249         | 160        | with beads |            |
|                    | B9        | PerCP/Cy5.5    | CD11b       | ICRF44       | biolegend         | B328101         | 80         | with cells |            |
|                    | B10       | PerCP/eF710    | CD274/PD-L1 | MIH5         | TFS               | 2236348/224625  | 20         | with beads |            |
| yellow green laser | YG1       | PE             | Clec9a      | 8F9          | biolegend         | B309940         | 80         | with cells |            |
|                    | YG2       | CF568          | CD4         | C4-206       | antibodies online | 18C0330         | 160        | with cells |            |
|                    | YG3       | PE/Dazzle 594  | CD206       | 15-feb       | biolegend         | B329923         | 20         | with beads |            |
|                    | YG4       | PE/Fire640     | CD25        | M-A251       | biolegend         | B321902/B332511 | 40         | with cells |            |
|                    | YG5       | PE/Cy5         | Tim3        | F38-2E2      | biolegend         | B312192         | 40         | with beads |            |
|                    | YG6       | PE/Fire700     | CD127       | AO19D5       | biolegend         | B321904         | 40         | with beads |            |
|                    | YG9       | PE/Cy7         | KLRG1       | SA231A2      | biolegend         | B317449         | 40         | with cells |            |
|                    | YG10      | PE/Fire810     | HLA-DR      | L243         | biolegend         | B341939         | 160        | with cells |            |
|                    | red laser | R1             | APC         | NGK2a        | Z199              | beckman Coulter | 200054     | 20         | with beads |
|                    |           | R2             | Alexa647    | CD68         | Y1/82A            | biolegend       | B311503    | 40         | with beads |
| R3                 |           | Spark NIR 685  | CD19        | HIB19        | biolegend         | B324543         | 160        | with beads |            |
| R4                 |           | APC/R700       | Lag3        | T47-530      | BD                | 1114707         | 80         | with cells |            |
| R7                 |           | APC/Fire750    | CCR7        | G043H7       | biolegend         | B306864/B338244 | 20         | with cells |            |
| R8                 |           | APC/Fire810    | CD27        | QA17A18      | biolegend         | B315671         | 320        | with beads |            |

For each Ab the detector, conjugated fluorochrome, antigen, clone name, company, lot, dilution and unmixing details are given.

156

|                                | <b>Antibody</b> | <b>Antigen</b> | <b>Fluorochrome</b> | <b>Clone</b> | <b>Dilution</b> | <b>Supplier</b>  |
|--------------------------------|-----------------|----------------|---------------------|--------------|-----------------|------------------|
| <b>Regulatory T cell panel</b> | 1               | CD3            | V500                | UCHT1        | 30              | BD Biosciences   |
|                                | 2               | CD4            | AlexaFluor700       | RPA-T4       | 50              | BD Biosciences   |
|                                | 3               | CD8            | BB700               | HIT8a        | 400             | BD Biosciences   |
|                                | 4               | CD25           | PE-Cy7              | 2A3          | 50              | BD Biosciences   |
|                                | 5               | CD127          | BV650               | A019D5       | 40              | Biolegend        |
|                                | 6               | CD45RA         | APC-H7              | HI100        | 150             | BD Biosciences   |
|                                | 7               | Foxp3*         | PE-CF594            | 259D/C7      | 150             | BD Biosciences   |
|                                | 8               | CTLA4*         | BV421               | BNI3         | 40              | BD Biosciences   |
|                                | 9               | KI67*          | FITC                | 20Raj1       | 50              | eBiosciences     |
|                                | 10              | Helios*        | APC                 | 22F6         | 100             | BD Biosciences   |
|                                | 11              | Tbet*          | PE                  | eBio4B10     | 80              | eBiosciences     |
| <b>Inhibitory marker panel</b> | 1               | CD3            | V450                | UCHT1        | 40              | BD Biosciences   |
|                                | 2               | CD4            | PE CF594            | RPA-T4       | 50              | BD Biosciences   |
|                                | 3               | CD8            | APC-Cy7             | SK1          | 40              | BD Biosciences   |
|                                | 4               | CD56           | AF700               | B159         | 10              | BD Biosciences   |
|                                | 5               | CTLA-4         | PE-Cy5              | BNI3         | 10              | BD Biosciences   |
|                                | 6               | PD-1           | PE-Cy7              | EH12.2H7     | 10              | Biolegend        |
|                                | 7               | TIM3           | BV605               | F38-E2E      | 80              | Biolegend        |
|                                | 8               | NKG2a          | PE                  | Z199         | 20              | Beckmann Coulter |
| <b>Memory marker panel</b>     | 1               | CD3            | V450                | UCHT1        | 40              | BD Biosciences   |
|                                | 2               | CD4            | PE CF594            | RPA-T4       | 50              | BD Biosciences   |
|                                | 3               | CD8            | APC-Cy7             | SK1          | 40              | BD Biosciences   |
|                                | 4               | CD25           | BV605               | 2A3          | 20              | BD Biosciences   |
|                                | 5               | CD27           | V500                | M-T-271      | 200             | BD Biosciences   |
|                                | 6               | CD28           | FITC                | CD28.2       | 10              | BD Biosciences   |
|                                | 7               | CD45RA         | PerCP-Cy5.5         | HI100        | 30              | Biolegend        |
|                                | 8               | CD45RO         | PE                  | UCHL1        | 20              | BD Biosciences   |
|                                | 9               | CD62L          | AF700               | DREG-56      | 80              | Biolegend        |
|                                | 10              | CD95           | PE-Cy7              | DX2          | 80              | Biolegend        |
|                                | 11              | CCR7           | A647                | 3D12         | 40              | BD Biosciences   |
| <b>Homing marker panel</b>     | 1               | CD3            | V450                | UCHT1        | 40              | BD Biosciences   |
|                                | 2               | CD4            | PE CF594            | RPA-T4       | 50              | BD Biosciences   |
|                                | 3               | CD8            | APC-Cy7             | SK1          | 40              | BD Biosciences   |
|                                | 4               | CD25           | FITC                | 2A3          | 25              | BD Biosciences   |
|                                | 5               | CD45RA         | PerCP-Cy5.5         | HI100        | 30              | Biolegend        |
|                                | 6               | CD45RO         | PE-Cy7              | UCHL1        | 40              | BD Biosciences   |
|                                | 7               | CXCR3          | AF700               | 1C5          | 20              | BD Biosciences   |
|                                | 8               | CCR4           | PE                  | 1G1          | 10              | BD Biosciences   |
|                                | 9               | CCR6 (CD196)   | BV605               | G034E3       | 10              | Biolegend        |
|                                | 10              | CCR10          | APC                 | 6S88-5       | 30              | Biolegend        |

*For each Ab the conjugated fluorochrome, clone name, dilution used, and supplier are given. \*indicates Ab that were used for staining of intracellular markers.*

157  
158



159
